# Supplementary material for: Increasing tropical cyclone intensity in the western North Pacific partly driven by warming Tibetan Plateau
Source: Springer Nature journal article supplement (doi:10.1038/s41467-023-44403-8), 2024-01-05
Supplement: 41467_2023_44403_MOESM1_ESM.pdf [file 41467_2023_44403_MOESM1_ESM.pdf]

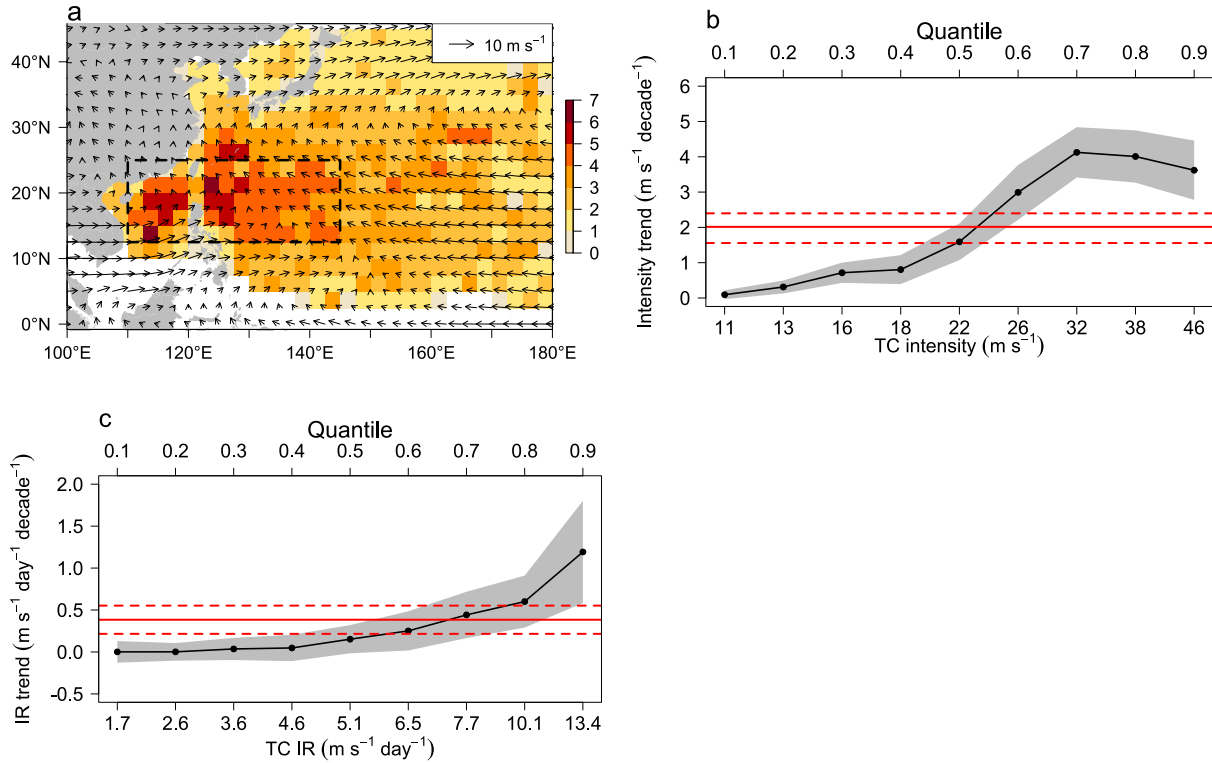

26  
27

28  
29

30 **Supplementary Figure 1. Climatological characteristics of observed tropical cyclone (TC)**

31 **activity, intensity, and intensification rate.** **a** The distributions of the number of the

32 climatological mean TC records (color) and 850-hPa wind ( $\text{m s}^{-1}$ ; vector) during 1988–2018, in

33 which the dashed box is for the monsoon trough (MT) area. **b** Linear trends ( $\text{m s}^{-1} \text{decade}^{-1}$ ) in

34 different quantiles of TC intensity ( $\text{m s}^{-1}$ ) in the MT area and their point-wise confidence bands

35 at the 0.05 level (shaded), in which the red solid line indicates the linear trend in TC intensity

36 for all cases in the MT area and the red dashed lines are the linear trends for the point-wise

37 confidence band at the 0.05 level. **c** As in **b** but for the TC intensification rate ( $\text{m s}^{-1} \text{day}^{-1}$

38  $\text{decade}^{-1}$ ). All data are for July-August-September (JAS). This figure was created using R

39 version 4.3.2 (<https://www.r-project.org/>). Source data are provided as a Source Data file.

40

41

42

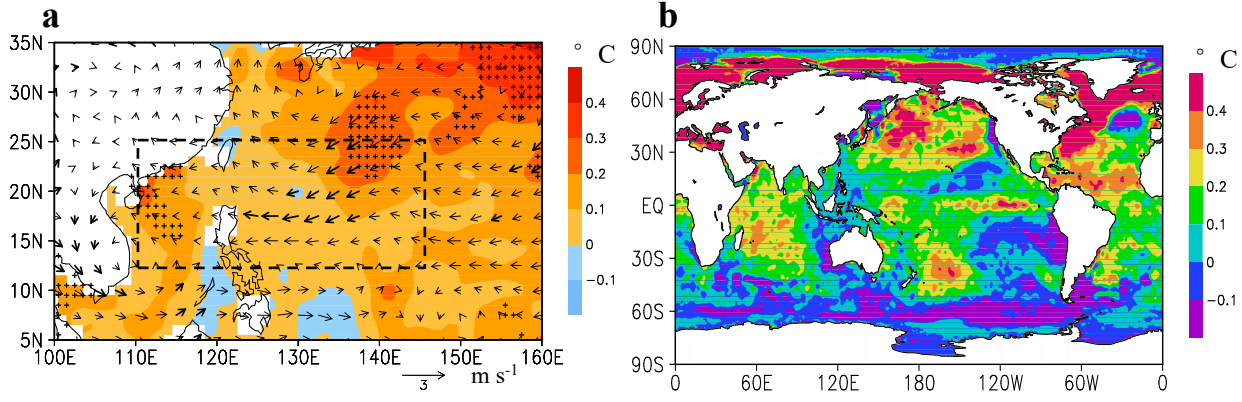

43

44

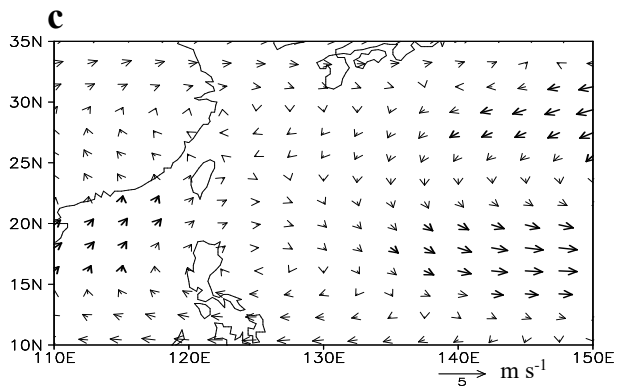

45

46 **Supplementary Figure 2. Anomalies of observed surface sea temperature (SST) and wind**

47 **and forced vertical wind shear (VWS) by global SST change. a** Differences of SST

48 (shaded; °C) and 850 hPa wind (vectors; m s<sup>-1</sup>) between P2 (period 2002-2018) and P1 (period

49 1988-2001), in which the plus sign is significant at the 0.05 confidence level and thick vectors

50 are at the 0.05 level. **b** Differences of SST (shaded; °C) between P2 and P1. **c** Differences in

51 VWS (m s<sup>-1</sup>) forced by the global SST change between P2 and P1 (thick vectors are at the 0.05

52 level). All data are for JAS. This figure was created using Grid Analysis and Display System

53 (GRADS) Version 2.0.a9.o9a.1 (<https://sourceforge.net/projects/opengrads/files/>). Source data

54 are provided as a Source Data file.

55

56

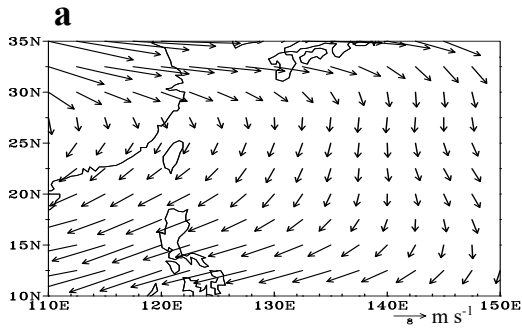

57

58

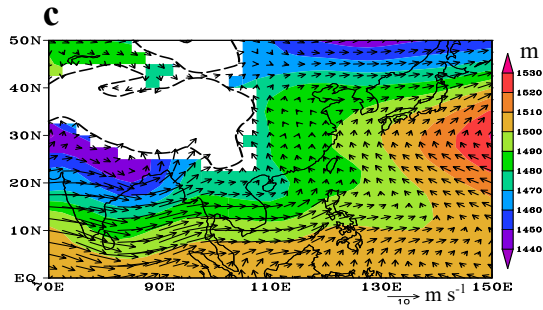

59

60

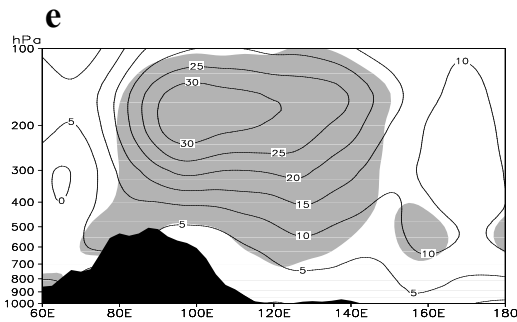

61

62

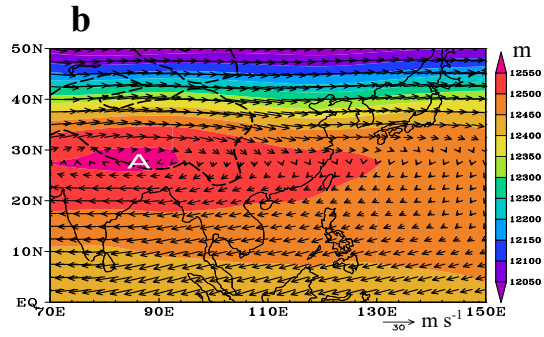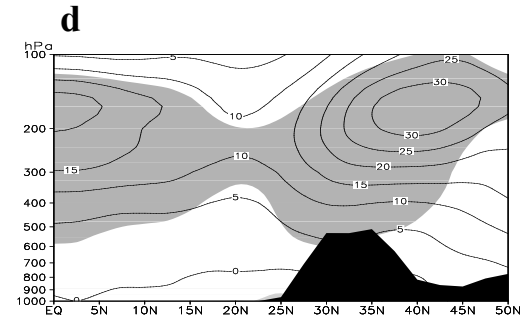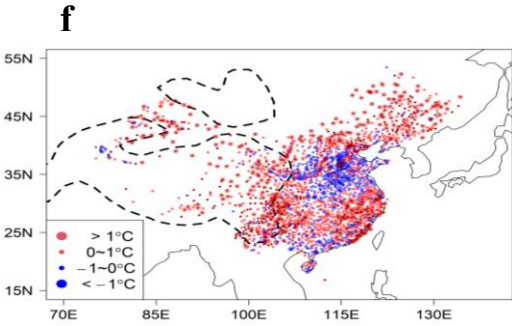

63 **Supplementary Figure 3. Atmospheric characteristics and anomalies between P2 and P1. a**

64 Climatological mean VWS ( $\text{m s}^{-1}$ ) between 200 hPa and 850 hPa. **b** Climatological mean

65 200-hPa geopotential height (m; shaded) and wind ( $\text{m s}^{-1}$ ; vector). **c** As in **b** but for 850 hPa. **d**

66 Latitude-height section of differences in geopotential height (m; light shaded areas are at the

67 0.05 level and the black shaded area indicates the topography) between P2 and P1 along

68  $80^{\circ}$ - $100^{\circ}$ E. **e** Same as in **d** but along  $30^{\circ}$ - $40^{\circ}$ N. **f** Differences in surface air temperature (SAT) at

69 meteorological stations ( $^{\circ}\text{C}$ ; black dots are at the 0.05 level) between P2 and P1. All data are for

70 JAS. **a-c** were created using Grid Analysis and Display System (GrADS) Version 2.2.1.oga.1

71 (<https://sourceforge.net/projects/opengrads/files/grads2/2.2.1.oga.1/>). **d-e** were created using

72 Grid Analysis and Display System (GRADS) Version 2.0.a9.oga.1

73 (<https://sourceforge.net/projects/opengrads/files/>). **f** was created using R version 4.3.2

74 (<https://www.r-project.org/>). Source data are provided as a Source Data file.

75

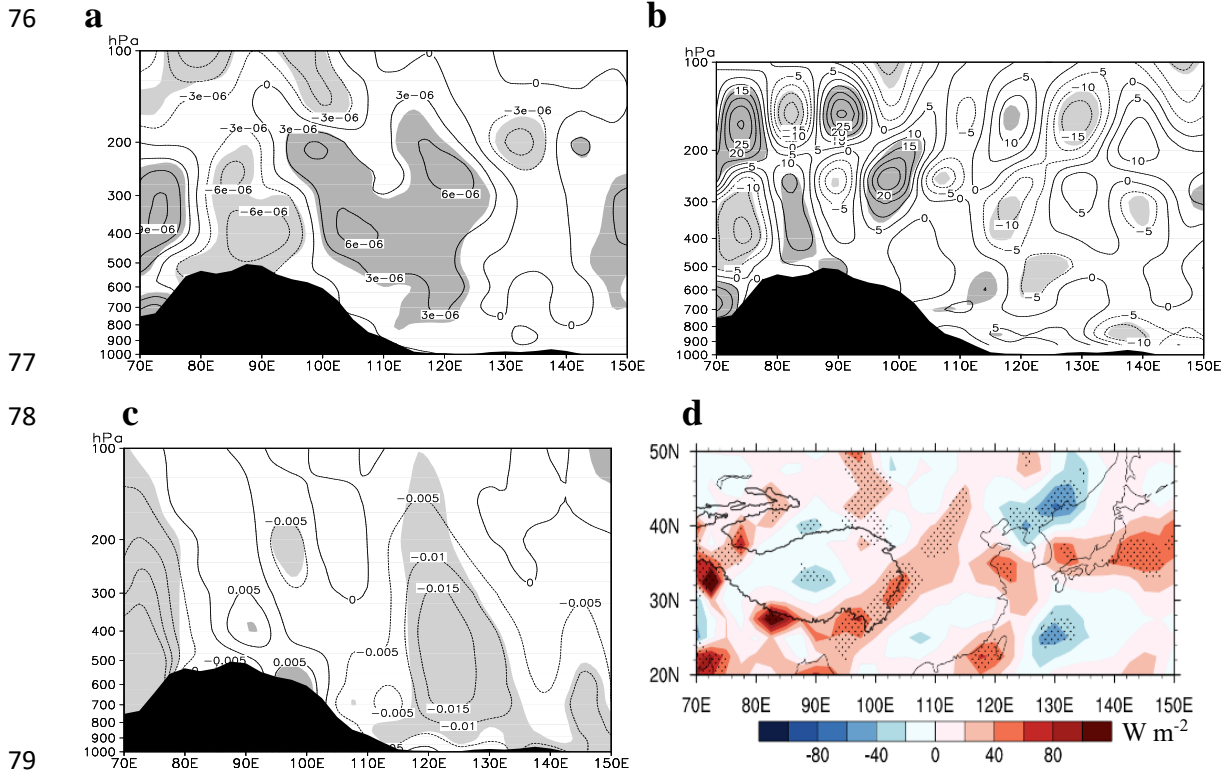

76 **a** **b**

77 1000 200 300 400 500 600 700 800 900 1000 70E 80E 90E 100E 110E 120E 130E 140E 150E 1000 200 300 400 500 600 700 800 900 1000 70E 80E 90E 100E 110E 120E 130E 140E 150E

78 **c** **d**

79 1000 200 300 400 500 600 700 800 900 1000 70E 80E 90E 100E 110E 120E 130E 140E 150E 50N 40N 30N 20N 70E 80E 90E 100E 110E 120E 130E 140E 150E

80 **Supplementary Figure 4. Dynamic and thermodynamic anomalies of observed**

81 **atmospheric circulation between P2 and P1. a** Longitude-height section of differences in

82 temperature advection ( $-\mathbf{V} \cdot \nabla T$ ;  $K s^{-1}$ ) along  $35^\circ N$ , in which shaded areas are at the 0.05 level

83 and black shaded area indicates the topography. **b** Same as in **a** but for  $\frac{\partial}{\partial z} (\mathbf{V} \cdot \nabla \zeta + \beta v)$  ( $\times 10^{-15}$

84  $m^{-1} s^{-1}$ ). **c** Same as in **a** but for  $p$ -vertical velocity ( $Pa s^{-1}$ ). **d** Differences in  $\langle Q_2 \rangle$  ( $W m^{-2}$ ), in

85 which dots are at the 0.05 level. All data are for JAS. **a-c** were created using Grid Analysis and

86 Display System (GRADS) Version 2.0.a9.oga.1 (<https://sourceforge.net/projects/opengrads/files/>).

87 **d** was created using NCAR Command Language (NCL) Version 6.5.0

88 (<https://www.ncl.ucar.edu/Download/>). Source data are provided as a Source Data file.

89

90

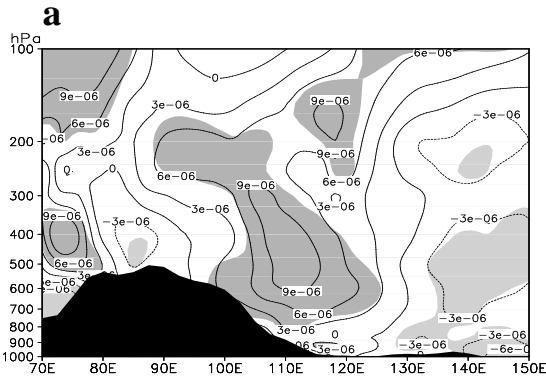

**b**

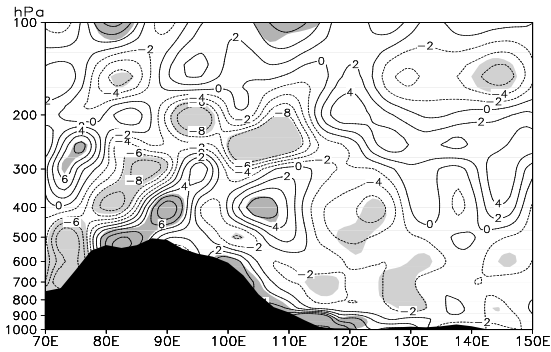

91

92

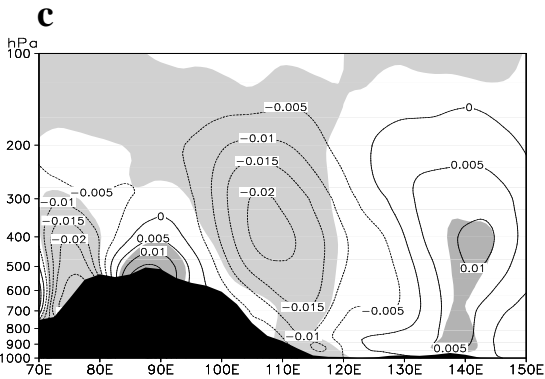

**d**

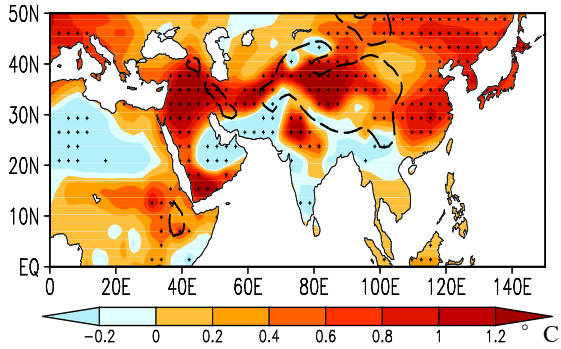

93

94

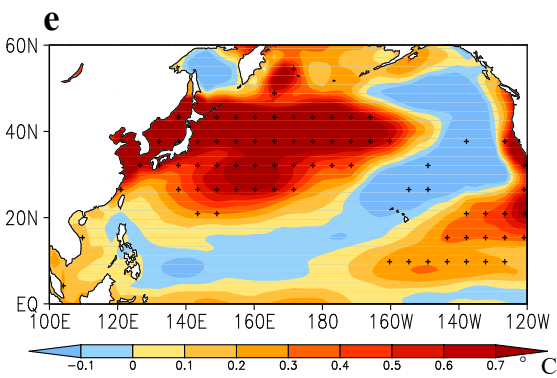

95

96 **Supplementary Figure 5. Anomalies forced by the warming TP. a** For longitude-height

97 section of temperature advection ( $-V \cdot \nabla T$ ;  $K s^{-1}$ ) along  $40^\circ N$ , in which shaded areas are at the

98  $0.05$  level. **b** Same as in **a** but for  $\frac{\partial}{\partial z} (V \cdot \nabla \zeta + \beta v)$  ( $\times 10^{-15} m^{-1} s^{-1}$ ).

99  $p$ -vertical velocity ( $Pa s^{-1}$ ). **d** For SAT ( $^\circ C$ ; shaded), in which the plus signs are at the  $0.05$  level.

100 **e** For SST. All data are for JAS. This figure was created using Grid Analysis and Display

101 System (GRADS) Version 2.0.a9.oga.1 (<https://sourceforge.net/projects/opengrads/files/>).

102 Source data are provided as a Source Data file.

103

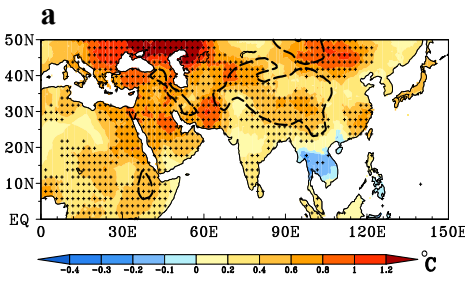

104  
105

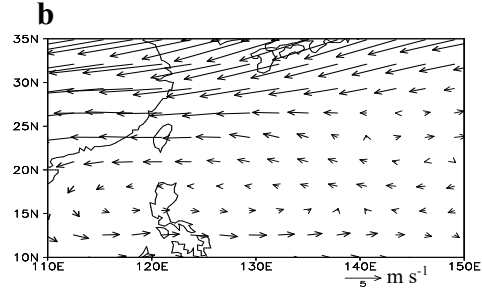

106  
107

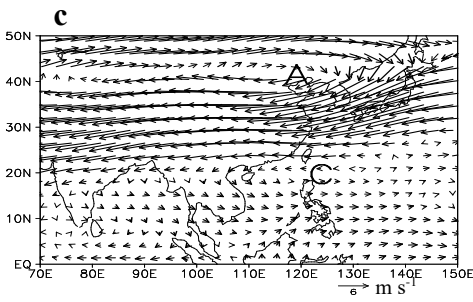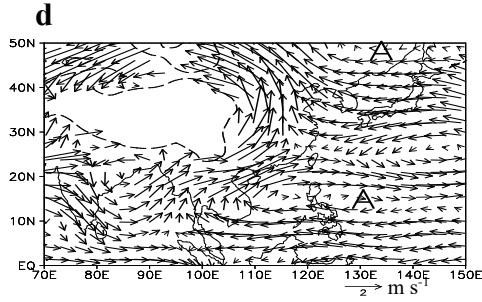

108  
109

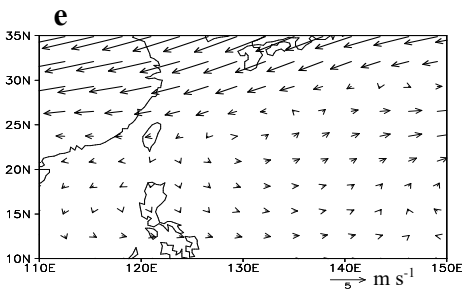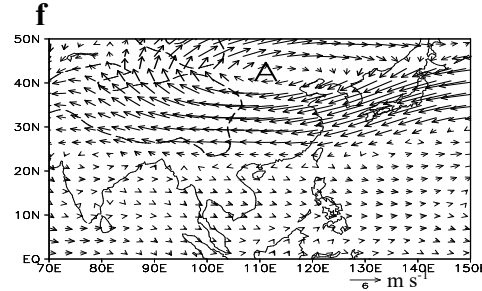

110  
111

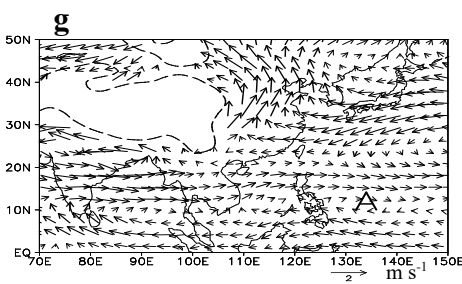

112

**Supplementary Figure 6. Observed and forced SAT, wind, and VWS anomalies. a** Differences in observed SAT ( $^{\circ}\text{C}$ ; shaded; the plus sign is at the 0.05 level) between P2 and P1.

113

**b** Differences in VWS ( $\text{m s}^{-1}$ ) between 200 hPa and 850 hPa forced by warming Asia relative to the control, in which thick vectors are at the 0.05 level. **c** Same as in **b** but for 200-hPa wind. **d**

115

Same as in **b** but for 850-hPa wind. **e** Same as in **b** but for warming Europe. **f** Same as in **e** but for 200-hPa wind. **g** Same as in **e** but for 850-hPa wind. All data are for JAS. This figure was

117

created using Grid Analysis and Display System (GRADS) Version 2.0.a9.oga.1

118

(<https://sourceforge.net/projects/opengrads/files/>). Source data are provided as a Source Data

119

file.



120

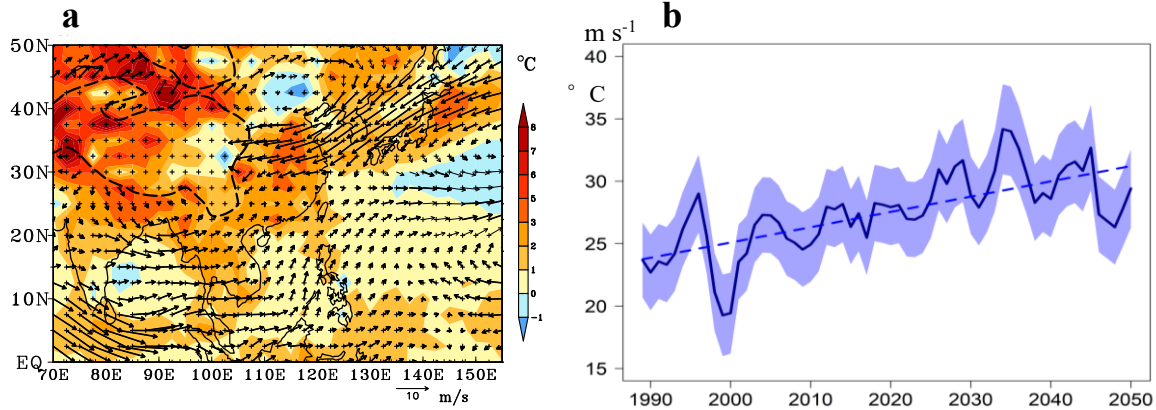

121  
122

123 **Supplementary Figure 7. Projections of SAT, VWS, and TC intensity by the CMIP 5**

124 **NCAR Community Climate System Model version 4 (CCSM4) under the Representative**

125 **Concentration Pathway (RCP) 4.5 scenario. a** Differences of JAS SAT (°C; shaded; the plus

126 sign is significant at the 0.05 level) and VWS (m s<sup>-1</sup>; vectors; black vectors are at the 0.05 level)

127 between 2022–2050 and 1988-2018. **b** The fitted JAS TC intensity (m s<sup>-1</sup>; the solid line) with

128 the three-year running mean VWS time series, in which the projection is under the RCP 4.5

129 scenario, with their interquartile ranges at the 0.05 level, and the dashed line is for the linear

130 trend. **a** was created using Grid Analysis and Display System (GrADS) Version 2.2.1.oga.1

131 (<https://sourceforge.net/projects/opengrads/files/grads2/2.2.1.oga.1/>). **b** was created using R

132 version 4.3.2 (<https://www.r-project.org/>). Source data are provided as a Source Data file.

133

134

135

136  
137

138

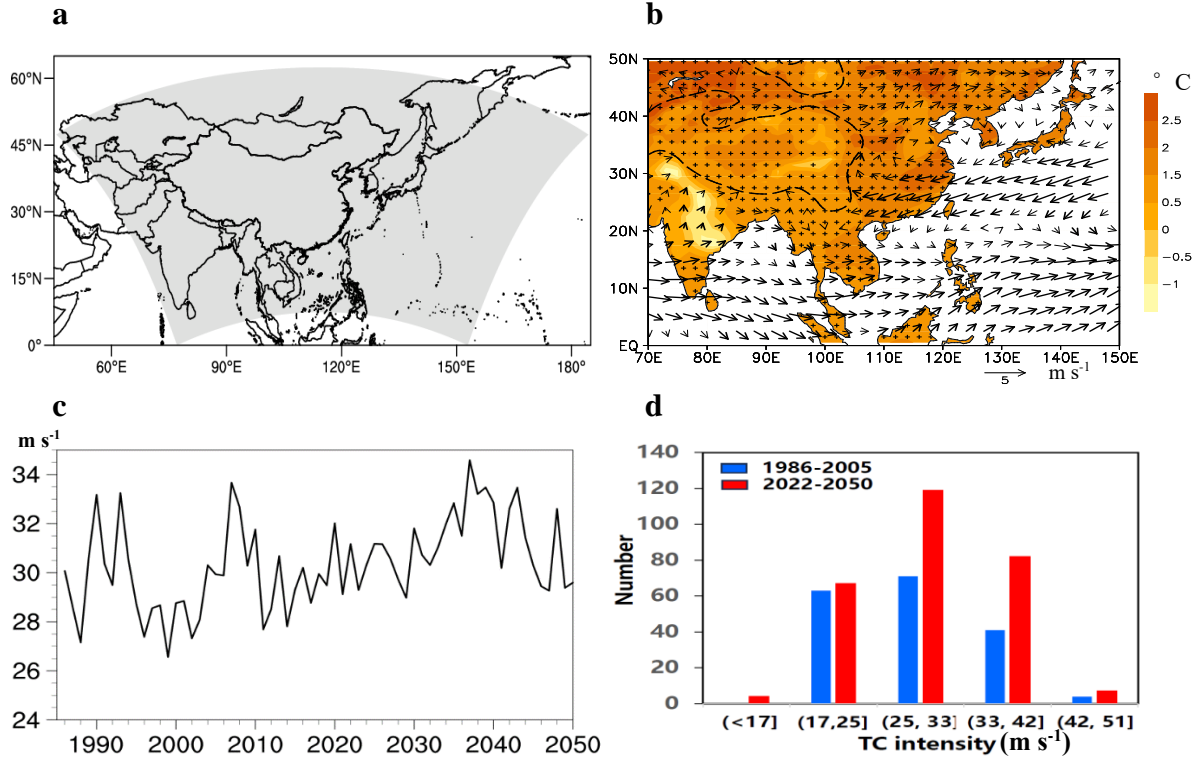

139 **Fig. S8 The model domain and projections of atmospheric circulation and TC intensity. a**

140 The CORDEX-East Asia domain (shaded). **b** Differences of the CMIP5 HadGEM2-ES

141 projected (2022-2050) surface temperature (°C; shaded) and VWS between 200 hPa and 850

142 hPa (m s<sup>-1</sup>; vector) under the RCP4.5 scenario relative to the reference period (1986-2005), in

143 which the plus sign is significant at the 0.05 level for temperature and thick vectors are at the

144 0.05 level. **c** The temporal curve of the RegCM4 maximum 10-m wind velocity (m s<sup>-1</sup>) around

145 the TC center averaging over 110°E-145°E, 15.5°N-27.5°N during 1986-2050, in which

146 1986-2005 is the historical simulation and 2006-2050 is under the RCP4.5 scenario. **d**

147 Relationship between the RegCM4 TC number and intensity in 110°E-145°E, 15.5°N-27.5°N.

148 All data are for JAS. **b** was created using Grid Analysis and Display System (GRADS) Version

149 2.0.a9.oga.1 (<https://sourceforge.net/projects/opengrads/files/>). **c** was created using NCAR

150 Command Language (NCL; <http://www.ncl.ucar.edu/>) 6.3.0. **d** was created using Microsoft

151 Excel. Source data are provided as a Source Data file.

152 **Supplementary Table 1.** Correlation of JAS TC intensity with OHC, SST, MPI, VWS, and TP  
 153 surface pressure (TPSP) during 1988-2018, in which the asterisk sign is significant at the 0.05  
 154 level. Source data are provided as a Source Data file.

| TC               | OHC    | SST    | MPI   | VWS    | TPSP  |
|------------------|--------|--------|-------|--------|-------|
| Original series  | -0.33  | -0.39* | -0.3  | -0.54* | 0.28  |
| Detrended series | -0.69* | -0.58* | -0.5* | -0.48* | 0.03  |
| Smoothed series  | 0.15   | 0.18   | 0.24  | -0.85* | 0.64* |

155
